# Supplementary material for: Triiodothyronine Levels Are Independently Associated with Metabolic Syndrome in Euthyroid Middle-Aged Subjects
Source: PubMed Central journal article supplement — Endocrinol Metab (Seoul). 2016 May 13;31(2):311–9. doi: 10.3803/EnM.2016.31.2.311 (PMC4923416; doi:10.3803/enm.2016.31.2.311), 2016-05-13
Supplement: enm-31-311-s001.pdf [file enm-31-311-s001.pdf]

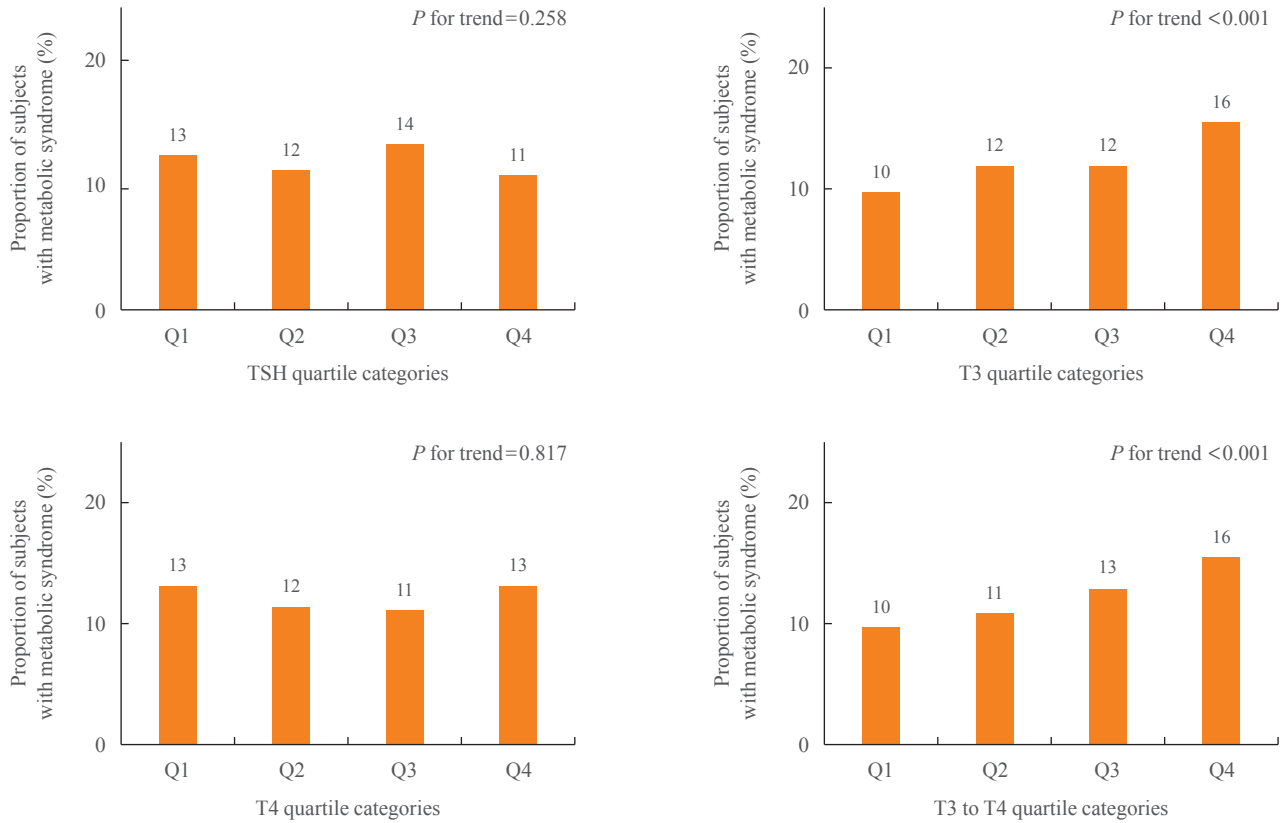

**Supplementary Fig. S1.** The proportion of subjects with metabolic syndrome by thyroid hormone quartile categories within the euthyroid range. TSH, thyroid stimulating hormone.
